# Supplementary figures and images for: SAFE-CAST: secure AI-federated enumeration for clustering-based automated surveillance and trust in machine-to-machine communication
Source: PeerJ journal article supplement (doi:10.7717/peerj-cs.2551), 2025-01-02

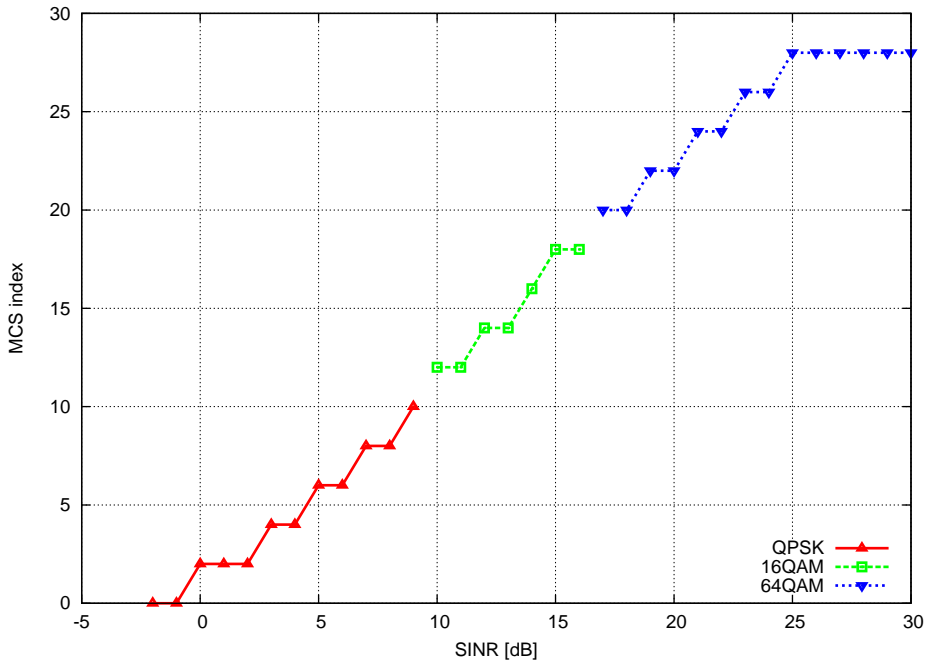

Supplement: code.zip [file code.zip]
